# Supplementary material
Source: PubMed Central journal article supplement (PMC4306455)

**A****mRNA Normalized Fold Expression**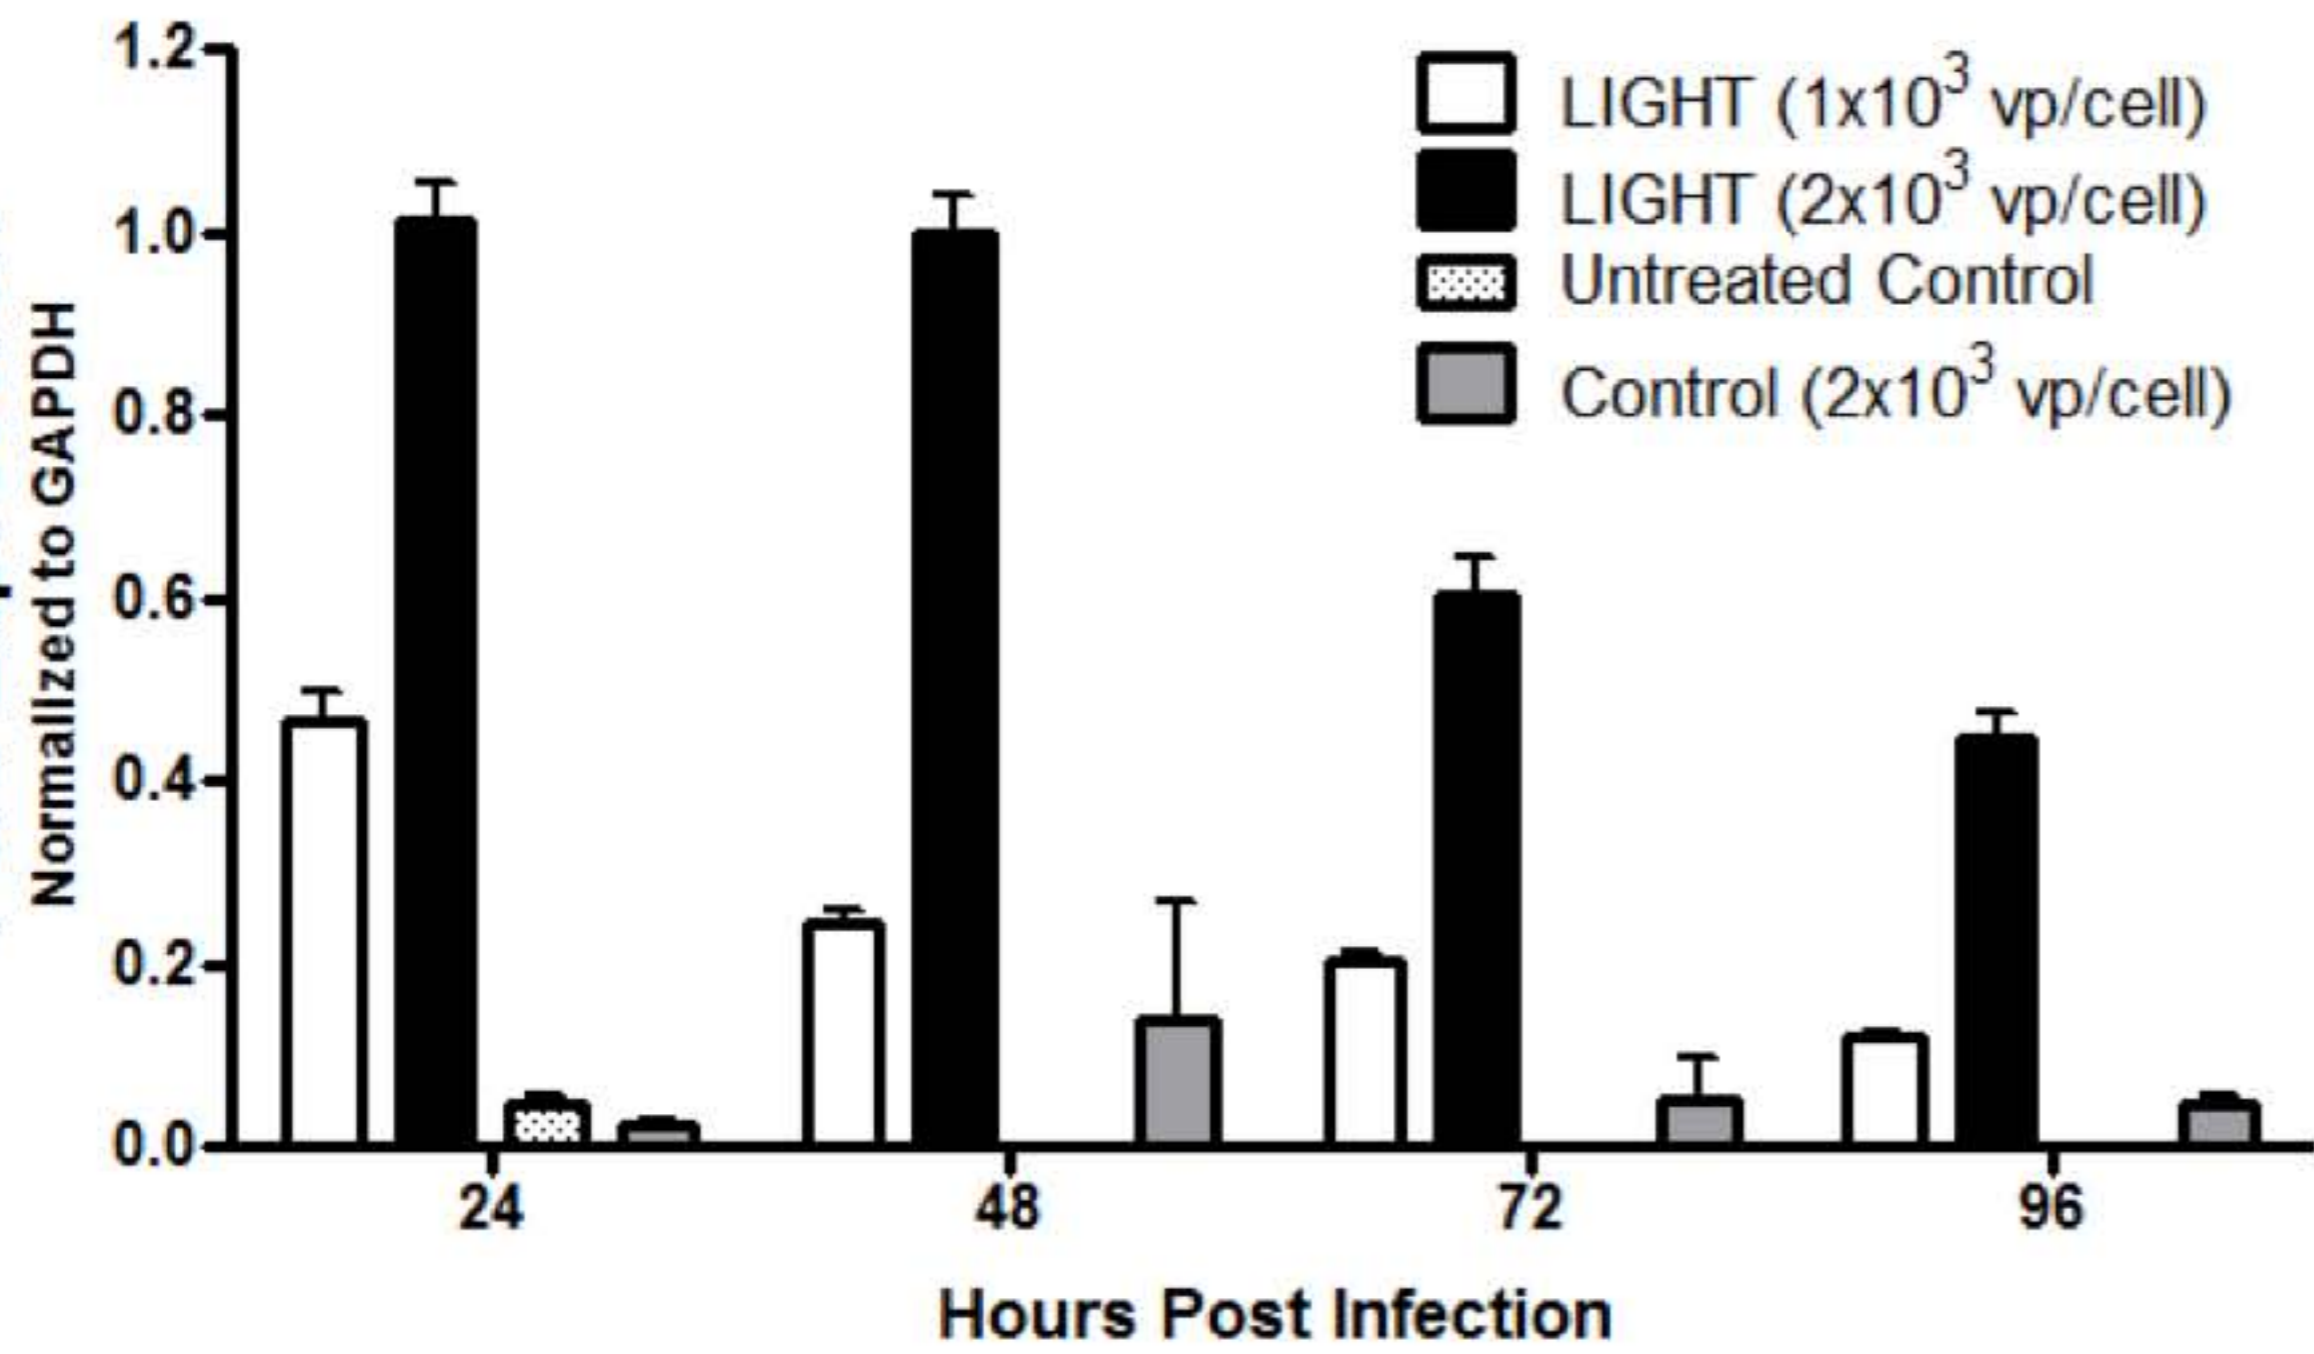**B****mLIGHT Expression (Mean Fluorescence Intensity)**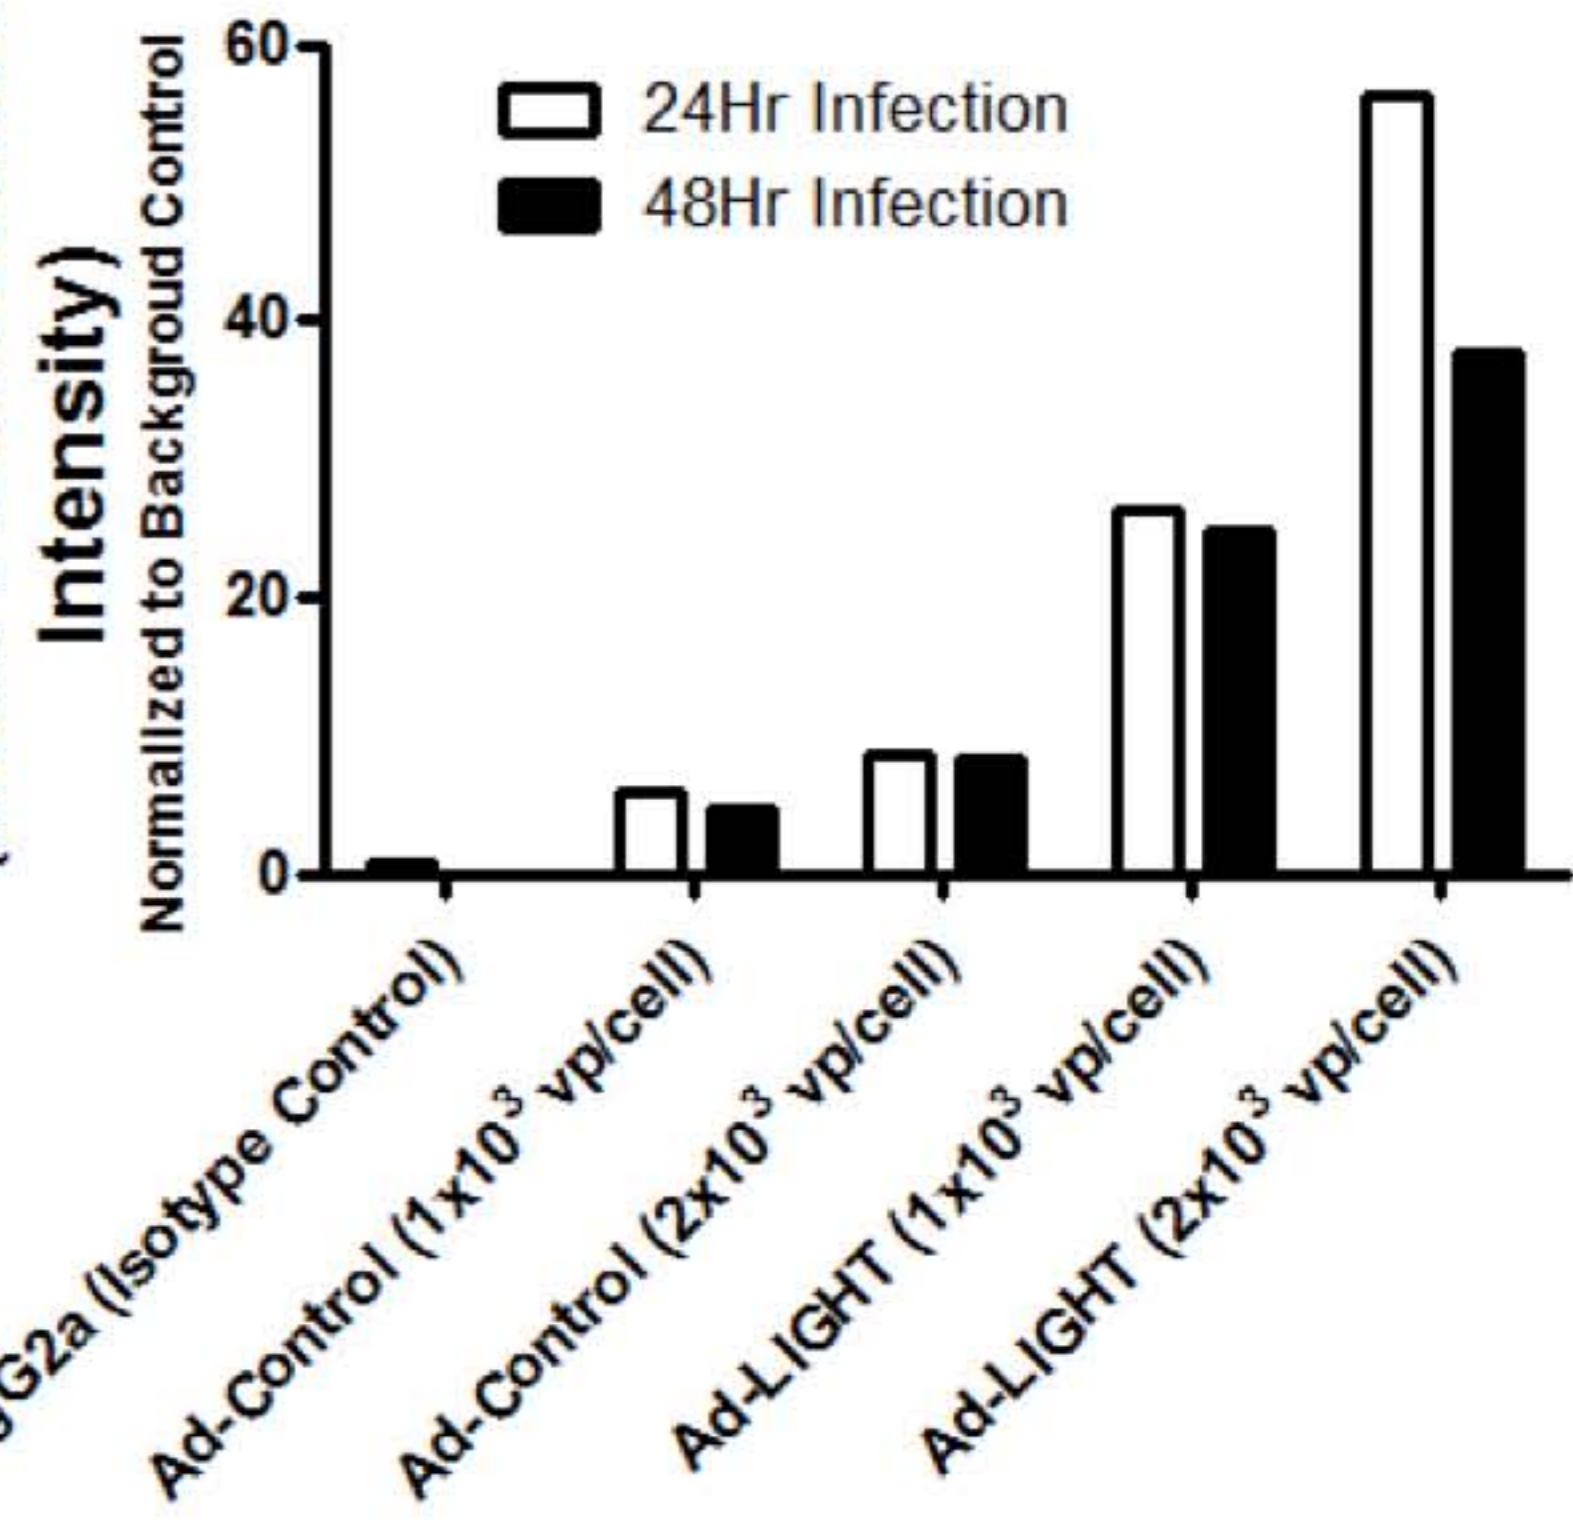

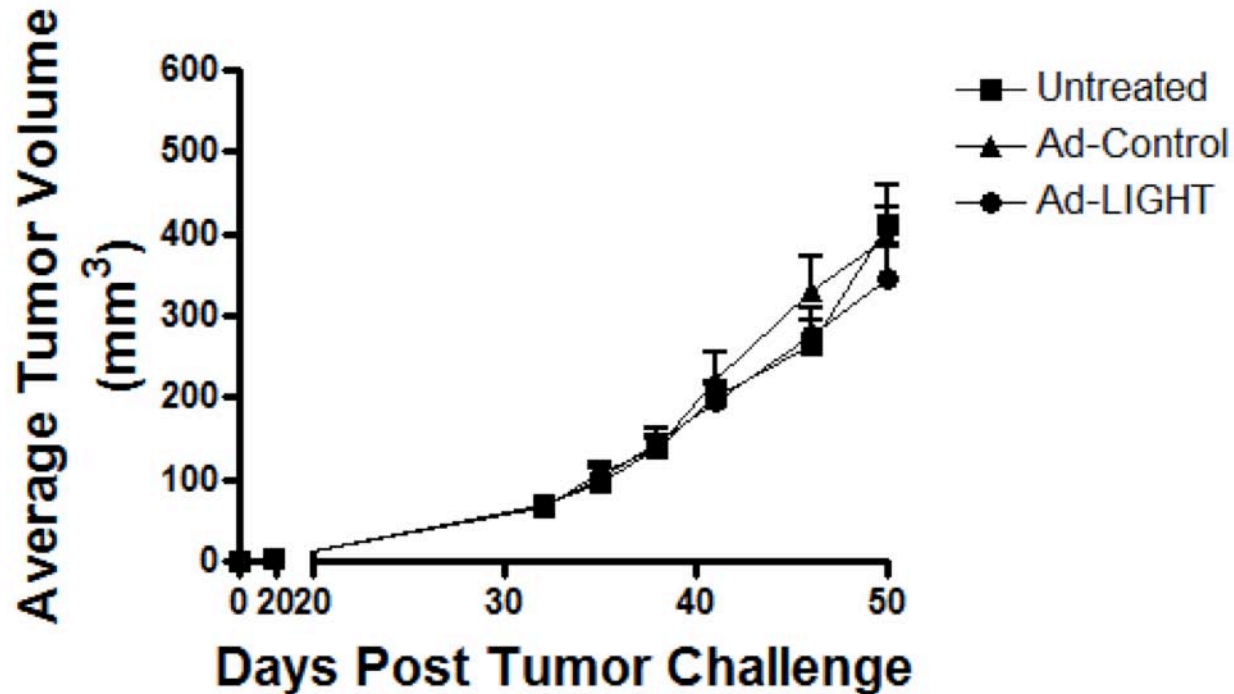

# ELISpot against mPSCA 83-91

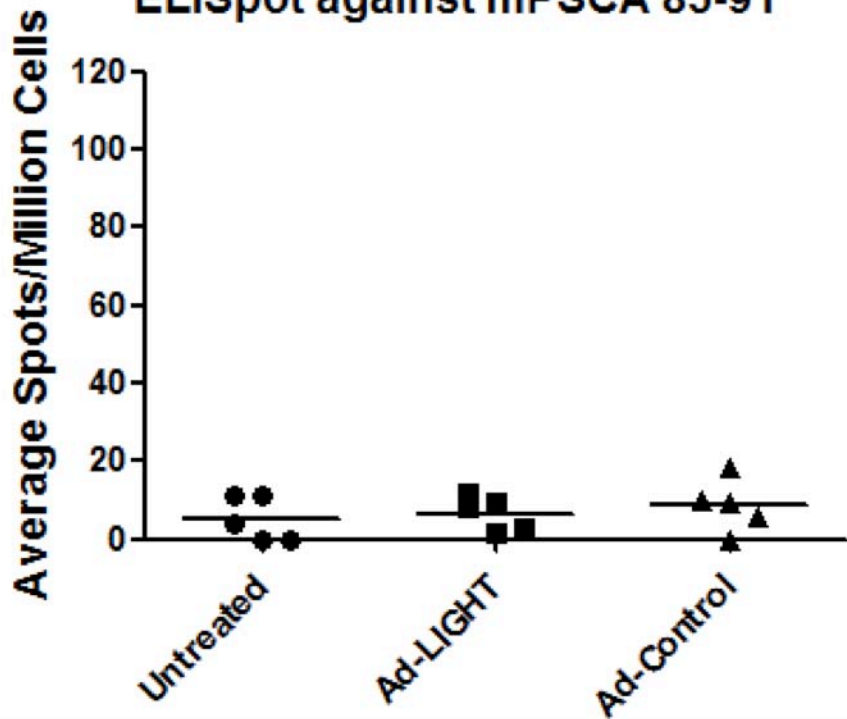

# Proliferation of responder T Cells

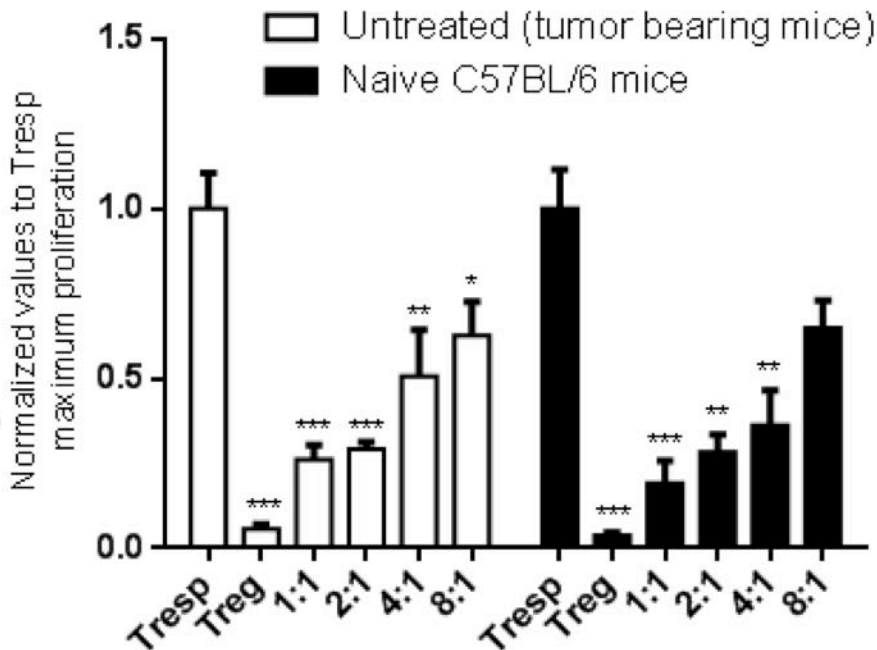

Supplement: NIHMS628196-supplement-Supp_FigureS1-S4.pdf [file NIHMS628196-supplement-Supp_FigureS1-S4.pdf]
